# Supplementary material
Source: Elsevier journal article supplement (http://publikationen.ub.uni-frankfurt.de/opus4/files/44031/mmc1.pdf)
Supplement: mmc1 [file mmc1.pdf]

## Supplemental Data

### Exome Sequencing Identifies Biallelic *MSH3*

### Germline Mutations as a Recessive Subtype

### of Colorectal Adenomatous Polyposis

Ronja Adam, Isabel Spier, Bixiao Zhao, Michael Kloth, Jonathan Marquez, Inga Hinrichsen, Jutta Kirfel, Aylar Tafazzoli, Sukanya Horpaopan, Siegfried Uhlhaas, Dietlinde Stienen, Nicolaus Friedrichs, Janine Altmüller, Andreas Laner, Stefanie Holzappel, Sophia Peters, Katrin Kayser, Holger Thiele, Elke Holinski-Feder, Giancarlo Marra, Glen Kristiansen, Markus M. Nöthen, Reinhard Büttner, Gabriela Möslein, Regina C. Betz, Angela Brieger, Richard P. Lifton, and Stefan Aretz

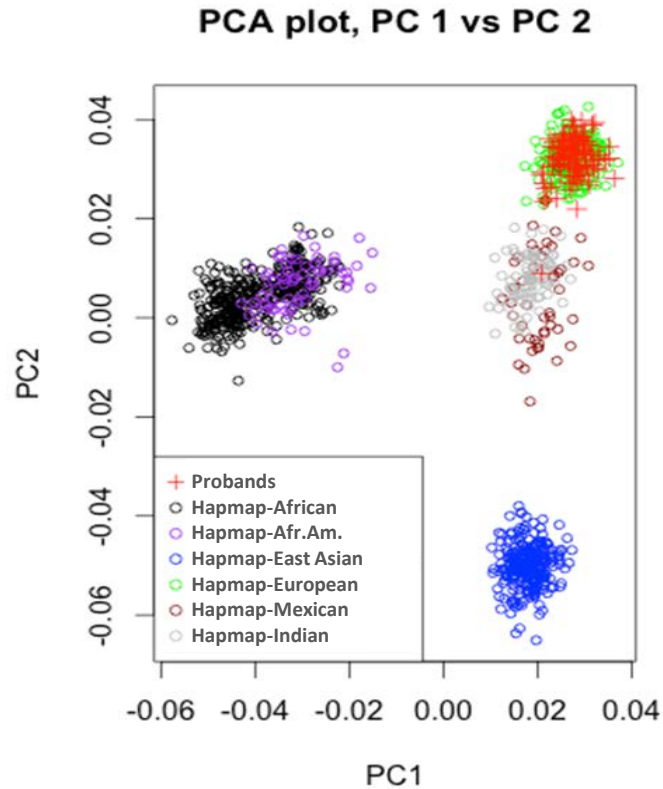

**Figure S1 Results of Principle Component Analysis (PCA).** The genotypes of the 100 probands who met coverage standards were compared to HapMap genotype data. A central European origin was indicated for all samples, with the exception of one outlier sample, which was subsequently excluded from further analysis.

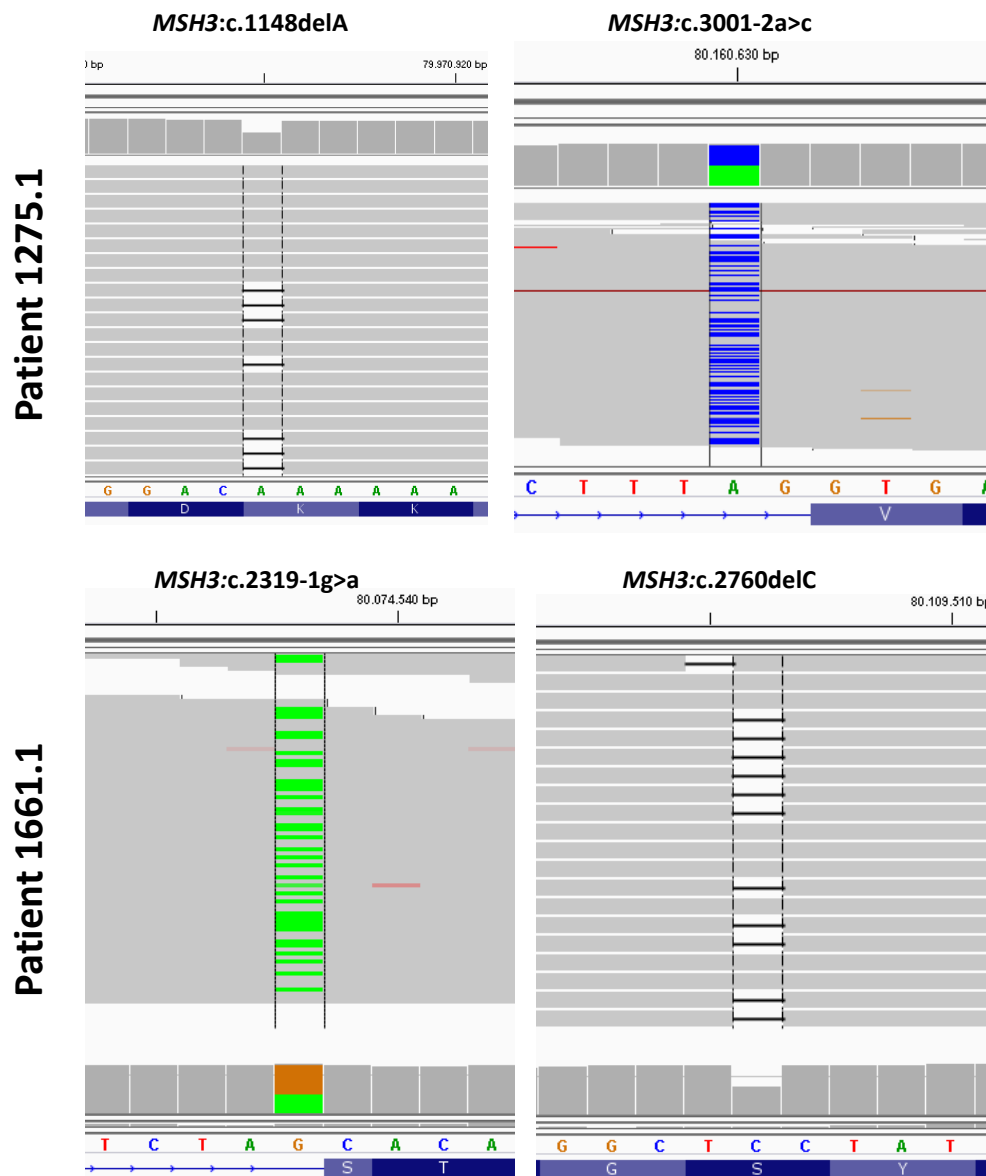

**Figure S2** *MSH3* mutations in exome sequencing data. Biallelic loss-of-function *MSH3* germline mutations identified via exome sequencing in leukocyte DNA of patients 1275.1 and 1661.1 (visual control of reads in IGV browser).

# Figure S3

|                | 0637 | 0720 | 0779 | 0856 | 0922 | 0929 | 1104 | 1138 | 1163 | 1181 | 1189 | 1245 | 1268 | 1275 | 1283 | 1301 | 1304 | 1324 | 1356 | 1558 | 1564 | 1606 | 1649 | 1661 | 5004 | 5019 | 5021 | 5028 | 5053 |
|----------------|------|------|------|------|------|------|------|------|------|------|------|------|------|------|------|------|------|------|------|------|------|------|------|------|------|------|------|------|------|
| <i>BTBD9</i>   |      |      |      |      |      |      |      |      |      |      |      |      |      |      |      |      |      |      |      |      |      |      |      |      |      |      |      |      |      |
| <i>CD36</i>    |      |      |      |      |      |      |      |      |      |      |      |      |      |      |      |      |      |      |      |      |      |      |      |      |      |      |      |      |      |
| <i>DNAJB7</i>  |      |      |      |      |      |      |      |      |      |      |      |      |      |      |      |      |      |      |      |      |      |      |      |      |      |      |      |      |      |
| <i>ECHDC3</i>  |      |      |      |      |      |      |      |      |      |      |      |      |      |      |      |      |      |      |      |      |      |      |      |      |      |      |      |      |      |
| <i>KIF4A</i>   |      |      |      |      |      |      |      |      |      |      |      |      |      |      |      |      |      |      |      |      |      |      |      |      |      |      |      |      |      |
| <i>MAGT1</i>   |      |      |      |      |      |      |      |      |      |      |      |      |      |      |      |      |      |      |      |      |      |      |      |      |      |      |      |      |      |
| <i>MSH3</i>    |      |      |      |      |      |      |      |      |      |      |      |      |      |      |      |      |      |      |      |      |      |      |      |      |      |      |      |      |      |
| <i>MYL5</i>    |      |      |      |      |      |      |      |      |      |      |      |      |      |      |      |      |      |      |      |      |      |      |      |      |      |      |      |      |      |
| <i>MYLIP</i>   |      |      |      |      |      |      |      |      |      |      |      |      |      |      |      |      |      |      |      |      |      |      |      |      |      |      |      |      |      |
| <i>PMS2</i>    |      |      |      |      |      |      |      |      |      |      |      |      |      |      |      |      |      |      |      |      |      |      |      |      |      |      |      |      |      |
| <i>PSMB7</i>   |      |      |      |      |      |      |      |      |      |      |      |      |      |      |      |      |      |      |      |      |      |      |      |      |      |      |      |      |      |
| <i>SLC27A5</i> |      |      |      |      |      |      |      |      |      |      |      |      |      |      |      |      |      |      |      |      |      |      |      |      |      |      |      |      |      |
| <i>SSC5D</i>   |      |      |      |      |      |      |      |      |      |      |      |      |      |      |      |      |      |      |      |      |      |      |      |      |      |      |      |      |      |
| <i>UGGT2</i>   |      |      |      |      |      |      |      |      |      |      |      |      |      |      |      |      |      |      |      |      |      |      |      |      |      |      |      |      |      |
| <i>WDR35</i>   |      |      |      |      |      |      |      |      |      |      |      |      |      |      |      |      |      |      |      |      |      |      |      |      |      |      |      |      |      |
| <i>ZC3H8</i>   |      |      |      |      |      |      |      |      |      |      |      |      |      |      |      |      |      |      |      |      |      |      |      |      |      |      |      |      |      |

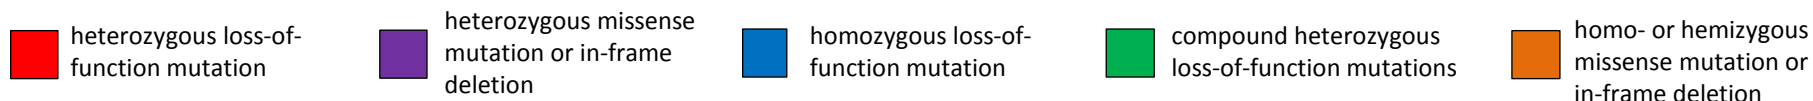

**Figure S3 Candidate genes identified in the present study.** All genes (labeled left) are affected by rare heterozygous or biallelic, potentially pathogenic variants in  $\geq 2$  alleles of the cohort. Patients (labeled above) harboring  $\geq 2$  mutated candidate genes are shown in red.

# Figure S4

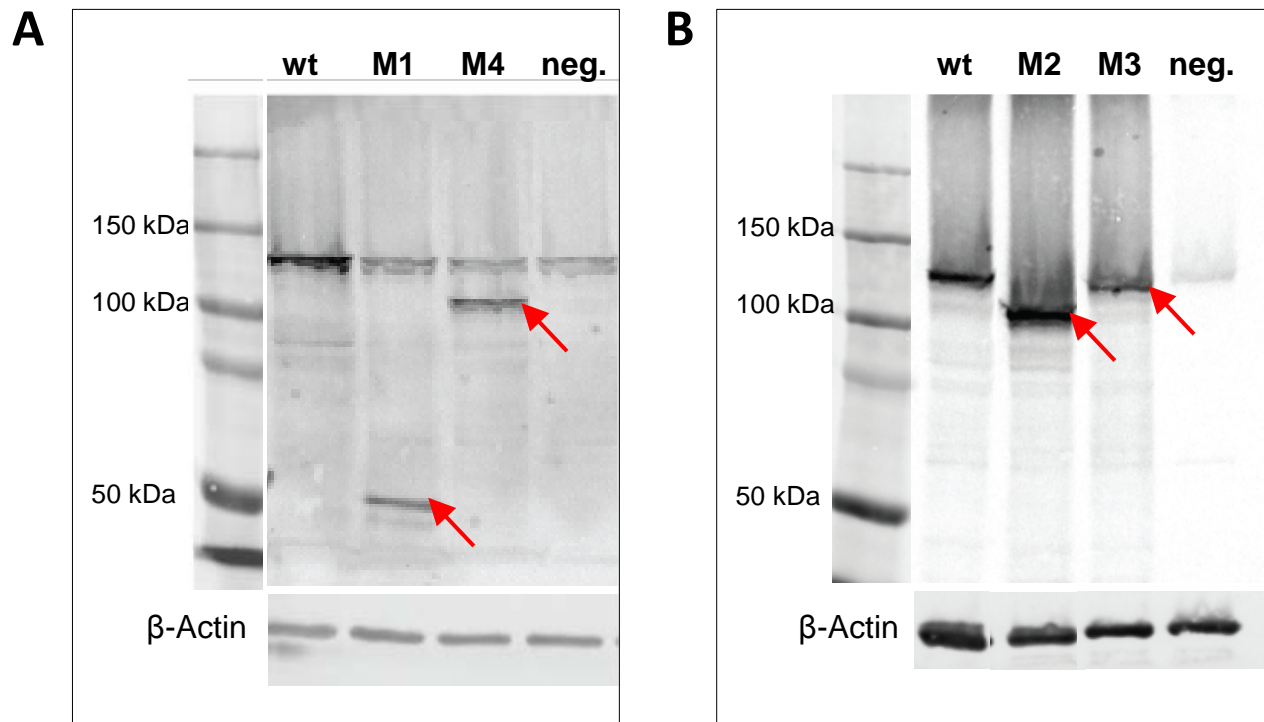

**C**

| lane | <i>MSH3</i> mutation | Predicted effect on protein and <i>MSH3</i> size |
|------|----------------------|--------------------------------------------------|
| wt   | wild type            | wild type: 130 kDa                               |
| M1   | c.1148delA           | p.Lys383Argfs*32: 46 kDa                         |
| M2   | c.3001-2a>c          | p.Val1001Argfs*16: 113 kDa                       |
| M3   | c.2319-1g>a          | p.Thr774_Glu812del: 123 kDa                      |
| M4   | c.2760delC           | p.Tyr921Metfs*36: 107 kDa                        |
| neg. | none                 | endogenous <i>MSH3</i> : 130kDa                  |

**Figure S4 Effects of *MSH3* mutations on protein level.** A vector carrying *MSH3* wild type (wt) or a *MSH3* variant was over-expressed in HEK293T cells. The frameshift variants (A) were constructed by site directed mutagenesis of *MSH3* wt. The splice site variants (B) were mimicked by vectors lacking the exon 22 (M2) or exon 17 (M3), respectively. From the predicted effects on protein level, the expected sizes were calculated (C). The Western blot shows *MSH3* sizes congruent with the predicted protein alterations. Endogenous wild type *MSH3* is found at a size of 130 kDa in all samples, including the negative (neg.) control transfected with a vector not coding *MSH3*.  $\beta$ -Actin staining was used to assess equal lane loading.

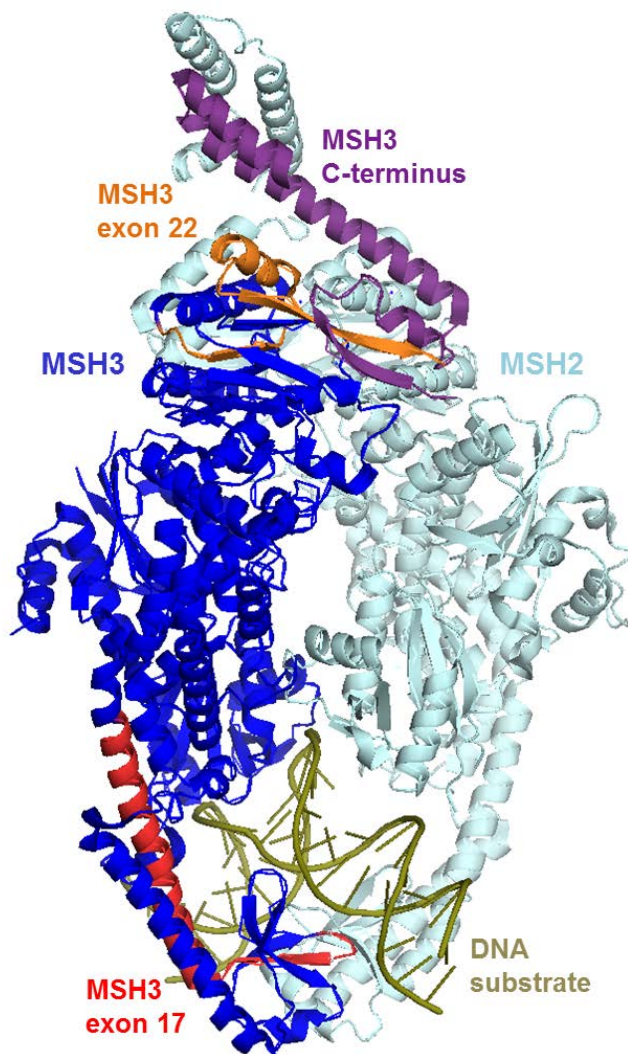

**Figure S5 Mapping of deleted exons to protein structure.** The human MutS $\beta$  structure published by Yang's group shows MSH2 (pale blue) and MSH3 (dark blue) binding to a dinucleotide loop (olive). We highlighted amino acids coded by regions affected by the altered splicing in red (exon 17), orange (exon 22) and purple (C-terminus altered through frameshift).

**Pat 1275.1 (polyp 18249/07 | 2)**

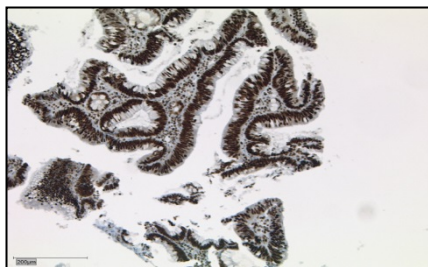

**MLH1**

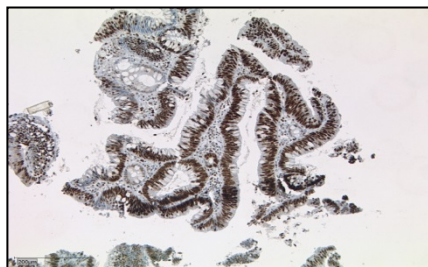

**MSH2**

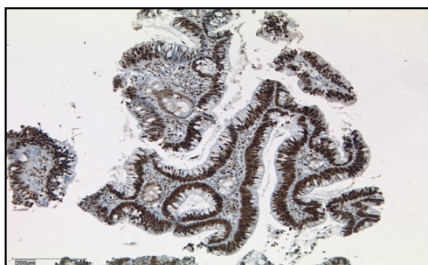

**MSH6**

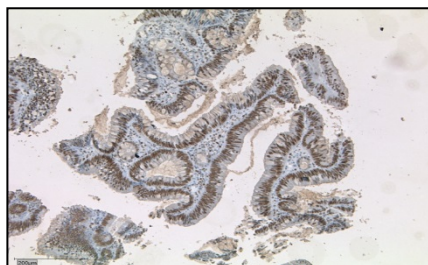

**PMS2**

**Pat 1661.1 (polyp 674/08)**

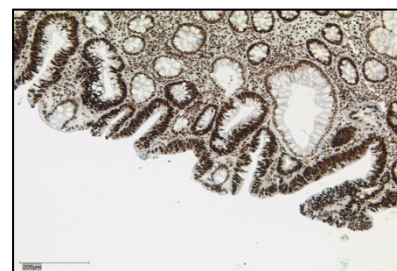

**MLH1**

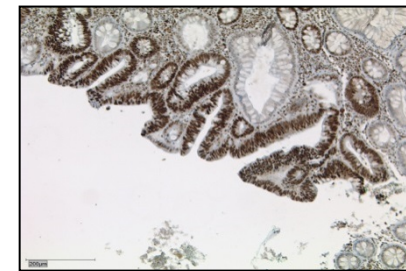

**MSH2**

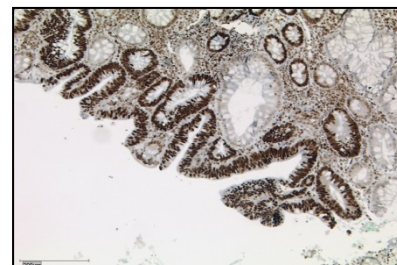

**MSH6**

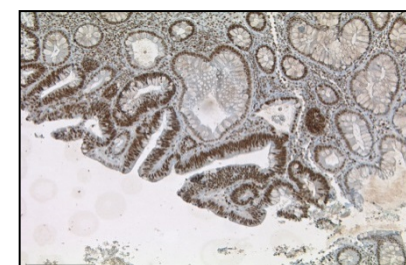

**PMS2**

**Figure S6 Expression of MMR partner proteins.** Immunohistochemical staining of adenoma tissue shows normal protein levels of other MMR proteins (MLH1, MSH2, MSH6 and PMS2) for the index patients of families 1275 and 1661.



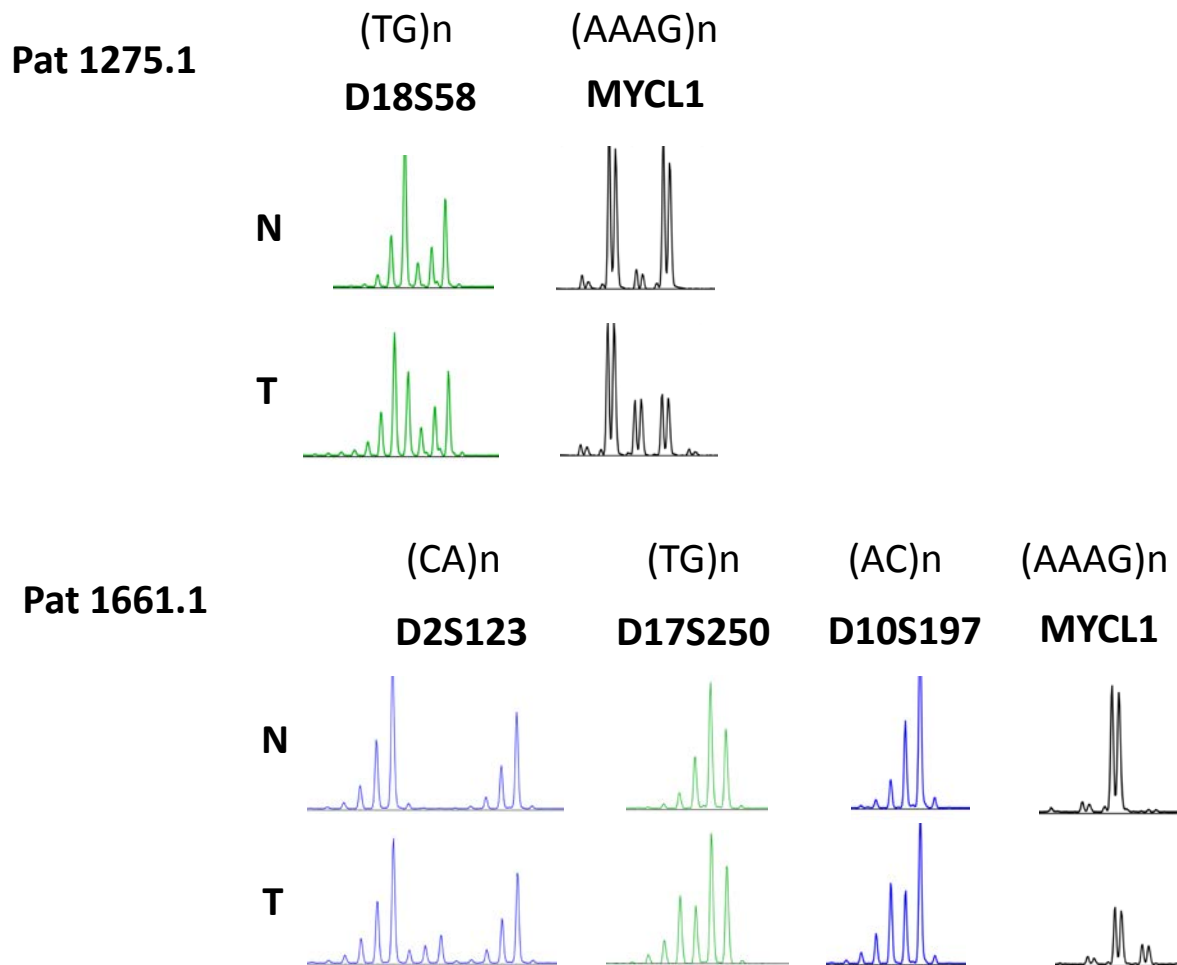

**Figure S7 Results for additional microsatellite markers.** Four dinucleotide repeat markers (D2S123, D17S250, D10S197, D18S58) and one further tetranucleotide repeat marker (MYCL1) were examined in normal and tumor tissue. Only those markers showing instability are depicted. All results were validated in a second tumor sample.

**APC:c.1876\_1879delACAA (36/30%)**

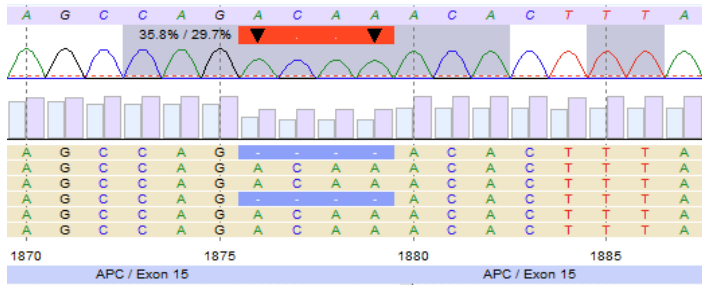

**Polyp  
E 48579-08**

**APC:c.4126\_4127delTA (31/26%)**

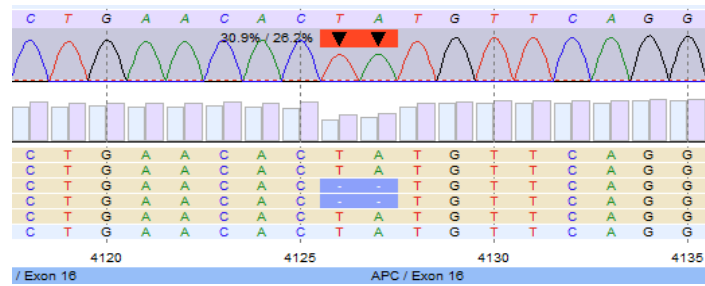

**APC:c.2740\_2741delITG (28/25%)**

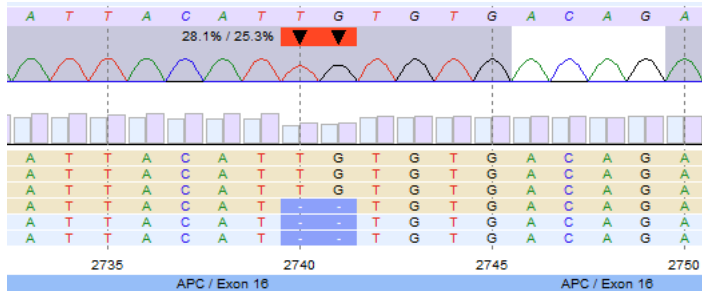

**Polyp  
674-08 3**

**APC:c.3011\_3018delTAGCCCAT (14/15%)**

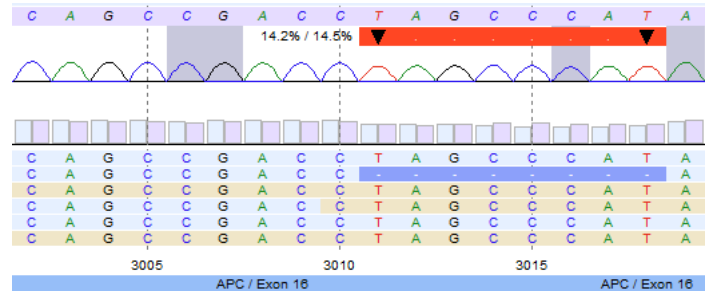

**APC:c.1640\_1641delITT (15/16%)**

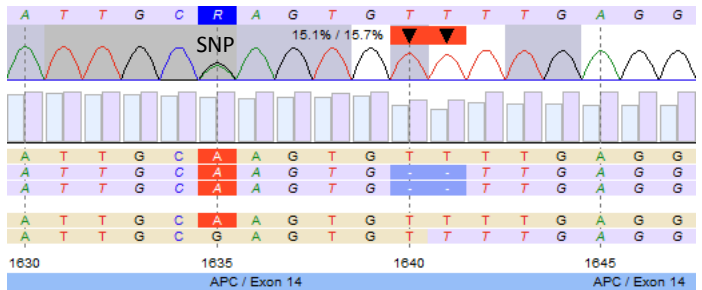

**Polyp  
674-08 4**

**APC:c.4385\_4388delAGAG (19/17%)**

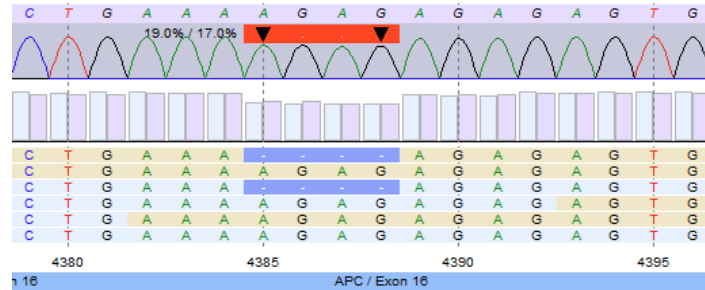

**APC:c.3468\_3469delIAG (7/6%)**

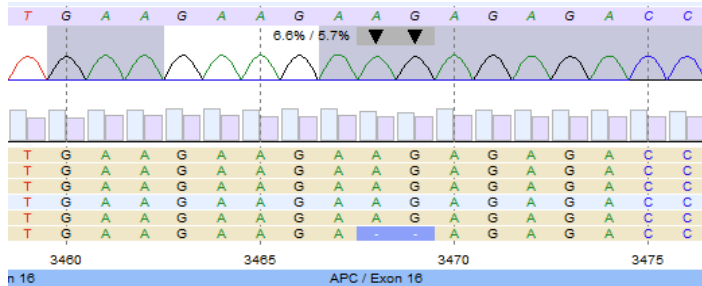

**Polyp  
674-08 2**

**Figure S8**

**Figure S8 Somatic *APC* mutations.** Targeted deep sequencing results for the *APC* gene in adenoma-derived DNA from patient 1661.1: Comparison of four independent adenomas with leukocyte DNA identified seven different somatic *APC* mutations (1-2 per polyp) in 6-36% of the reads (the percentage of mutated reads in the forward and reverse reads respectively is shown in brackets). All seven mutations were small deletions of 2-8 nucleotides. In 4/7 mutations, the sequence context proved to be di- or trinucleotide repeats.

A

***PMS2*:c.2T>A;p.Met1?**

```

cctcagctctcagctcgtccatggatgcaaacacccgatccgcctcggggg
|         |         |         |         |
6048630   6048640   6048650   6048660   6048670
CCTCAGCTCTCAGCTCGCTCGTTGG
CCTCAGCTCTCAGCTCGCTCGTTGGA
CCTCAGGCTCTCAGCTCGATCCATGGATGCAACAC
cctcagctctcagctcgtccatggatgcaaacacccgatc
cctcagctctcagctcgtccatggatgcaaacacccgatccgcct
cctcagctctcagctcgtccatggatgcaaacacccgatccgcct
CCTCAGCTCTCAGCTCGCTCGTTGGATGCAACACCCGATCCGCC
cctcagctctcagctcgtccatggatgcaaacacccgatccgcctcggggg
cctcagctctcagctcgtccatggatgcaaacacccgatccgcctcggggg
CCTCAGCTCTCAGCTCGCTCGTTGGATGCAACACCCGATCCGCCCTCGGGGA
CCTCAGCTCTCAGCTCGCTCGTTGGATGCAACACCCGATCCGCCCTCGGGGA
cctcagctctcagctcgtccatggatgcaaacacccgatccgcctcggggg
gagctctcagctcgtccatggatgcaaacacccgatccgcctcggggg
AGCTCTCAGCTCGCTCGATGGATGCAACACCCGATCC
gctctcagctcgtccatggatgcaaacacccgatccgcctcggggg
tcgctccatggatgcaaacacccgatccgcctcggggg
cgctccatggatgcaaacacccgatccgcctcggggg

```

***PMS2*:c.863delA;p.Gln288Argfs\*19**

```

aggccgcgggttgataaaagaaaaactgtctgtctgttgaactccttccaac
|         |         |         |         |
6035180   6035190   6035200   6035210   6035220
AGGCCGCCGGTTGATAAAGAAAAACGTCTGTCTGTTGAACT
aggccgcgggttgataaaagaaaaactgtctgtctgttgaac
AGGCCGCCGGTTGATAAAGAAAAACGTCTGTCTGTTGAACTC
AGGCCGCCGGTTGATAAAGAAAAACTGTCTGTCTGTTGAAC
AGGCCGCCGGTTGATAAAGAAAAACGTCTGTCTGTTGAACT
aggccgcgggttgataaaagaaaaactgtctgtctgttgaactc
aggccgcgggttgataaaagaaaaactgtctgtctgttgaactc
aggccgcgggttgataaaagaaaaactgtctgtctgttgaactc
aggccgcgggttgataaaagaaaaactgtctgtctgttgaactc
aggccgcgggttgataaaagaaaaactgtctgtctgttgaactc
AGGCCGCCGGTTGATAAAGAAAAACTGTCTGTCTGTTGAACTCCT
aggccgcgggttgataaaagaaaaactgtctgtctgttgaactcct
AGGCCGCCGGTTGATAAAGAAAAACTGTCTGTCTGTTGAACTCCTTC
AGGCCGCCGGTTGATAAAGAAAAACTGTCTGTCTGTTGAACTCCTTC
AGGCCGCCGGTTGATAAAGAAAAACGTCTGTCTGTTGAACTCCTTC

```

B

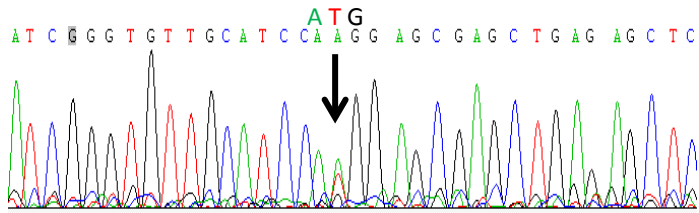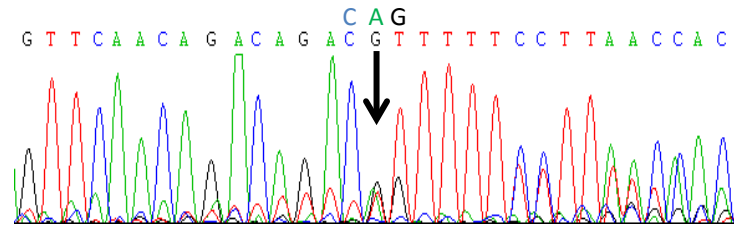

C

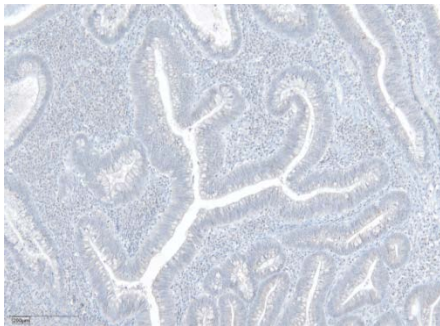

D

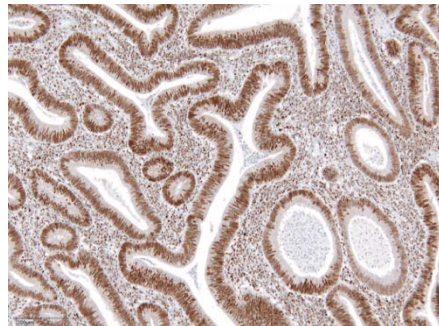

E

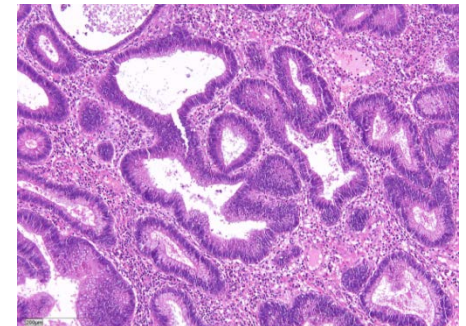

**Figure S9 *PMS2* germline mutations.** (A) Exome sequencing from leukocyte-derived DNA of patient 1138 revealed the mutations c.2T>A;p.Met1? and c.863delA;p.Gln288Argfs\*19 in *PMS2* (reverse sequence, Varbank). (B) Sanger validation of *PMS2* exons 1 and 8 confirmed both mutations (top line shows reference). (C) Immunohistochemical staining of both tumor and normal tissue shows complete loss of *PMS2* protein, whereas (D) *MLH1* expression is normal. (E) H-E staining.

**Table S1.** Summary statistics of exome sequencing performance and calling of variants.

| PARAMETER                       | MEAN    | MEDIAN  | ST DEV |
|---------------------------------|---------|---------|--------|
| # of Reads (M)                  | 65.7    | 64.6    | 11.0   |
| Median Coverage (X)             | 55.6    | 54.5    | 9.4    |
| Mean Coverage (X)               | 66.6    | 65.3    | 10.8   |
| % on genome                     | 91.8%   | 91.9%   | 0.5%   |
| % on target                     | 66.2%   | 66.4%   | 1.7%   |
| % of bases covered at least 4x  | 96.6%   | 96.8%   | 0.6%   |
| % of bases covered at least 8x  | 94.1%   | 94.3%   | 1.1%   |
| % of bases covered at least 20x | 84.1%   | 84.4%   | 2.8%   |
| Mean error rate                 | 0.5%    | 0.5%    | 0.1%   |
| % of PCR duplicate              | 4.9%    | 4.7%    | 1.0%   |
| # of hom. SNVs                  | 11606.8 | 11650.0 | 301.1  |
| % of novel hom. SNVs            | 0.2%    | 0.2%    | 0.1%   |
| # of het. SNVs                  | 18474.9 | 18502   | 603.7  |
| % of novel het. SNVs            | 2.3%    | 2.1%    | 0.8%   |

het. = heterozygous; hom = homozygous; SNV= single nucleotide variants; st dev = standard deviation

**Table S2.** Clinical characteristics of the cohort (n=102).

|                                            |           |
|--------------------------------------------|-----------|
| No. of patients                            | 102       |
| Gender (female / male)                     | 45 / 57   |
| Age at diagnosis (years)                   |           |
| Mean                                       | 45        |
| Standard deviation                         | 14        |
| Range                                      | 14-73     |
| No. of colorectal adenomas                 |           |
| 21-50                                      | 36 (35 %) |
| 51-100                                     | 22 (22 %) |
| > 100                                      | 16 (16 %) |
| “numerous” / “multiple” <sup>a</sup>       | 28 (27 %) |
| Colorectal cancer                          | 29 (28 %) |
| Duodenal polyps                            | 13 (13 %) |
| Extracolonic tumors (details see Table S3) | 14 (14 %) |
| Family history <sup>b</sup>                |           |
| Familial                                   | 20 (20 %) |
| Simplex                                    | 45 (44 %) |
| Unclear                                    | 37 (36 %) |

<sup>a</sup> “numerous” / “multiple” refers to cases where no exact numbers of polyps were mentioned in the clinical reports. However, based on all available information it is very likely that the inclusion criteria are met in these individuals.

<sup>b</sup> Family history refers to the presence of a colorectal polyposis in the relatives of the index polyposis patients; “Familial” is defined as the presence of at least one further first or second degree relative with multiple colorectal polyps; “Simplex” is defined as an isolated case with complete unobscured family history regarding colorectal polyposis or early onset colorectal cancer, and “Unclear” is defined as the situation where a distinction between simplex and familial is impossible, e.g. a first or second degree relative with non-early-onset colorectal cancer and no known colorectal polyposis.

**Table S3.** Extracolonic tumor spectrum (malignant tumors and rare benign tumors, sorted by location) of the cohort (index patients), including one of the patients with biallelic *MSH3* mutations (ID 1661) and the patient with biallelic *PMS2* mutations (ID 1138).

| ID   | Extracolonic tumors (age at diagnosis)                                                                  |
|------|---------------------------------------------------------------------------------------------------------|
|      | <b>Malignant tumors</b>                                                                                 |
| 1661 | astrocytoma (26 y)                                                                                      |
| 1138 | primitive neuroectodermal tumor (PNET) of the cerebellum (4 y), pilomatrixoma, three café-au-lait spots |
| 1300 | M. Hodgkin (21 y), basalioma (50 y)                                                                     |
| 666  | five basaliomas (34 y and 45 y)                                                                         |
| 1356 | skin cancer (~45 y)                                                                                     |
| 1375 | malignant melanoma (31 y and 47 y)                                                                      |
| 568  | breast cancer (48 y)                                                                                    |
| 696  | breast cancer (66 y)                                                                                    |
| 1189 | duodenal neuroendocrine, gastrin producing tumour (48 y)                                                |
| 1481 | renal cell carcinoma (65 y)                                                                             |
| 5007 | renal cell carcinoma (65 y)                                                                             |
| 736  | prostate cancer (51 y)                                                                                  |
|      | <b>Rare benign tumors</b>                                                                               |
| 807  | retroperitoneal fibrosis (29 y)                                                                         |
| 1294 | adrenal gland adenoma (27 y)                                                                            |

Table S4

Candidate genes affected by rare potentially pathogenic variants identified in the present study.

| Pat. ID | Gene          | Mutation Type     | Geno-type  | Coding DNA Change | Predicted Prot. Change | Result of RNA Analysis   | Ref. Cov. | Non-Ref. Cov. | Sanger Valid. | Phylo P | dbSNP Accession Number | mRNA Accession Number | TCGA | mRNA Expr. <sup>a</sup> | Prot. Expr. <sup>a</sup> | RVIS <sup>b</sup> (Per-centile) | HIS <sup>c</sup> (%) | Gene Function                                                                                                                                                                                |
|---------|---------------|-------------------|------------|-------------------|------------------------|--------------------------|-----------|---------------|---------------|---------|------------------------|-----------------------|------|-------------------------|--------------------------|---------------------------------|----------------------|----------------------------------------------------------------------------------------------------------------------------------------------------------------------------------------------|
| 5021    | <i>BTBD9</i>  | nonsense          | het.       | c.1480C>T         | p.Arg494*              | na                       | 36        | 23            | yes           | 1.09    | rs377402489            | NM_001099272.1        | 0    | T                       | F                        | -0.96 (9.1)                     | 0.267 (33.3)         | Potential involvement in synaptic plasticity and vesicle recycling                                                                                                                           |
| 1245    | <i>BTBD9</i>  | nonsense          | het.       | c.1080G>A         | p.Trp360*              | na                       | 30        | 25            | yes           | 5.94    |                        |                       |      |                         |                          |                                 |                      |                                                                                                                                                                                              |
| 1558    | <i>CD36</i>   | frameshift        | het.       | c.79dupA          | p.Met27Asnfs*13        | na                       | 82        | 42            | yes           |         |                        | NM_00101548.2         | 1    | T                       | T                        | -1.7 (2.6)                      | 0.847 (4.7)          | Receptor for thrombospondins; <i>cell adhesion</i> molecule; transports / regulates long chain fatty acids; reported involvement in <i>apoptosis</i> and <i>cancer stem cell</i> maintenance |
| 5019    | <i>CD36</i>   | frameshift        | het.       | c.708_709del      | p.Ser237Leufs*10       | na                       | 139       | 74            | yes           |         | rs146885545            |                       |      |                         |                          |                                 |                      |                                                                                                                                                                                              |
| 1163    | <i>CD36</i>   | nonsense          | het.       | c.971C>G          | p.Ser324*              | na                       | 37        | 23            | na            | -0.12   |                        |                       |      |                         |                          |                                 |                      |                                                                                                                                                                                              |
| 0922    | <i>DNAJB7</i> | in-frame deletion | het.       | c.122_124del      | p.Glu41del             | na                       | 48        | 29            | yes           | 1.01    |                        | NM_145174.1           | 0    | F                       | F                        | 0.69 (85.1)                     | 0.106 (70.4)         | Likely activity as a cochaperone                                                                                                                                                             |
| 1104    | <i>DNAJB7</i> | in-frame deletion | het.       | c.122_124del      | p.Glu41del             | na                       | 41        | 22            | yes           | 1.01    |                        |                       |      |                         |                          |                                 |                      |                                                                                                                                                                                              |
| 1301    | <i>DNAJB7</i> | missense          | het.       | c.205G>A          | p.Gly69Ser             | na                       | 27        | 25            | na            | 4.16    |                        |                       |      |                         |                          |                                 |                      |                                                                                                                                                                                              |
| 0929    | <i>ECHDC3</i> | splice site       | het.       | c.591+1G>A        | p.Val131_Lys197del     | in-frame loss of exon 4  | 17        | 20            | yes           | 4.08    | rs200347426            | NM_024693.4           | 1    | T                       | T                        | 0.42 (77.2)                     | 0.102 (72.1)         | Mitochondrially expressed, may be involved in dehalogenase, hydratase, and isomerase activities etc.                                                                                         |
| 1564    | <i>ECHDC3</i> | splice site       | het.       | c.591+1G>A        | p.Val131_Lys197del     | in-frame loss of exon 4  | 16        | 12            | yes           | 4.08    | rs200347426            |                       |      |                         |                          |                                 |                      |                                                                                                                                                                                              |
| 5004    | <i>ECHDC3</i> | missense          | het.       | c.667G>A          | p.Val223Met            | na                       | 12        | 18            | yes           | 5.20    | rs375091889            |                       |      |                         |                          |                                 |                      |                                                                                                                                                                                              |
| 5028    | <i>KIF4A</i>  | missense          | hemiz.     | c.2387G>A         | p.Arg796Gln            | na                       | 0         | 34            | na            | 5.11    |                        | NM_012310.4           | 6    | T                       | T                        | -0.75 (13.6)                    |                      | Microtubule motor prot.: molecular transport; possibly involved in <i>chromosomal stability</i> during mitosis and <i>cell cycle control</i>                                                 |
| 1283    | <i>KIF4A</i>  | in-frame deletion | hemiz.     | c.2427_2429del    | p.Ser810del            | na                       | 11        | 35            | na            |         |                        |                       |      |                         |                          |                                 |                      |                                                                                                                                                                                              |
| 0856    | <i>MAGT1</i>  | nonsense          | homo.      | c.71C>G           | p.Ser24*               | na                       | 0         | 25            | yes           | 0.52    |                        | NM_032121.5           | 0    | T                       | T                        | 0.1 (61.5)                      | 0.104 (71.1)         | Magnesium cation transporter, may have a role in N-glycosylation, mutations in this gene cause MRX95 and <i>XMEN-syndrome</i>                                                                |
| 1275    | <i>MSH3</i>   | frameshift        | comp.-het. | c.1148delA        | p.Lys383Argfs*32       | na                       | 67        | 39            | yes           |         |                        | NM_002439.4           | 1    | T                       | F                        | -0.08 (47.3)                    | 0.486 (16.2)         | <i>Mismatch repair prot.</i>                                                                                                                                                                 |
| 1275    | <i>MSH3</i>   | splice site       |            | c.3001-2a>c       | p.Val1001Argfs*16      | loss of exon 22          | 57        | 39            | yes           | 3.40    |                        |                       |      |                         |                          |                                 |                      |                                                                                                                                                                                              |
| 1661    | <i>MSH3</i>   | splice site       | comp.-het. | c.2319-1g>a       | p.Thr774_Glu812del     | in-frame loss of exon 17 | 74        | 74            | yes           | 5.61    |                        |                       |      |                         |                          |                                 |                      |                                                                                                                                                                                              |
| 1661    | <i>MSH3</i>   | frameshift        |            | c.2760delC        | p.Tyr921Metfs*36       | r.2760delC               | 62        | 48            | yes           |         |                        |                       |      |                         |                          |                                 |                      |                                                                                                                                                                                              |
| 1268    | <i>MYL5</i>   | missense          | homo.      | c.263T>C          | p.Phe88Ser             | na                       | 1         | 69            | na            | 3.67    | rs2228354              | NM_002477.1           | 0    | T                       | T                        | 1.37 (94.5)                     | 0.174 (48.2)         | Component of myosin, involved in calcium binding for regulation of muscle contraction                                                                                                        |
| 5053    | <i>MYL5</i>   | missense          | homo.      | c.263T>C          | p.Phe88Ser             | na                       | 0         | 48            | na            | 3.67    | rs2228354              |                       |      |                         |                          |                                 |                      |                                                                                                                                                                                              |



|      |                          |            |            |              |                  |    |    |    |     |      |             |                |   |   |    |                |                 |                                                                                                                                              |
|------|--------------------------|------------|------------|--------------|------------------|----|----|----|-----|------|-------------|----------------|---|---|----|----------------|-----------------|----------------------------------------------------------------------------------------------------------------------------------------------|
| 1304 | <i>MYLIP</i>             | missense   | het.       | c.515A>G     | p.Glu172Gly      | na | 41 | 24 | na  | 4.79 |             | NM_013262.3    | 0 | T | na | 0.35<br>(74.5) | 0.163<br>(50.8) | E3 ubiquitin-prot. ligase, mediates degradation of myosin regulatory light chain and lipoprotein receptors                                   |
| 1356 | <i>MYLIP</i>             | missense   | het.       | c.779C>T     | p.Ala260Val      | na | 20 | 15 | na  | 5.57 | rs201781624 |                |   |   |    |                |                 |                                                                                                                                              |
| 5042 | <i>MYLIP</i>             | missense   | het.       | c.850G>C     | p.Val284Leu      | na | 23 | 31 | na  | 6.42 |             |                |   |   |    |                |                 |                                                                                                                                              |
| 1138 | <i>PMS2</i>              | start loss | comp.-het. | c.2T>A       | p.Met1?          | na | 6  | 12 | yes | 2.47 |             | NM_000535.5    | 2 | T | T  | 1.48<br>(95.3) | 0.786<br>(6.1)  | <i>Mismatch repair prot.</i>                                                                                                                 |
| 1138 | <i>PMS2</i>              | frameshift |            | c.863delA    | p.Gln288Argfs*19 | na | 68 | 68 | yes |      |             |                |   |   |    |                |                 |                                                                                                                                              |
| 0637 | <i>PSMB7</i>             | missense   | het.       | c.635C>G     | p.Ser121Cys      | na | 36 | 38 | na  | 5.98 |             | NM_002799.3    | 0 | T | T  | 0.1<br>(61.45) | 0.528<br>(14.2) | Proteasome subunit responsible for trypsin-like activity; affects anti-cancer drug responses                                                 |
| 0720 | <i>PSMB7</i>             | missense   | het.       | c.125C>G     | p.Thr42Ser       | na | 70 | 57 | na  | 4.35 |             |                |   |   |    |                |                 |                                                                                                                                              |
| 1304 | <i>PSMB7</i>             | missense   | het.       | c.74T>G      | p.Leu25Trp       | na | 34 | 41 | na  | 5.01 |             |                |   |   |    |                |                 |                                                                                                                                              |
| 1324 | <i>SLC27A5</i>           | nonsense   | homo.      | c.1375C>T    | p.Arg459*        | na | 0  | 43 | yes | 0.72 |             | NM_012254.2    | 1 | T | F  | 0.29<br>(71.6) | 0.067<br>(87.4) | Fatty acid metabolism                                                                                                                        |
| 1189 | <i>SSC5D</i>             | nonsense   | het.       | c.2568G>A    | p.Trp856*        | na | 16 | 10 | yes | 1.68 |             | NM_001195267.1 | 5 | T | T  | 3.78<br>(99.6) |                 | Scavenger receptor activity, immune response                                                                                                 |
| 0922 | <i>SSC5D</i>             | nonsense   | het.       | c.1540C>T    | p.Gln514*        | na | 12 | 18 | yes | 0.78 |             |                |   |   |    |                |                 |                                                                                                                                              |
| 0637 | <i>UGGT2</i>             | frameshift | het.       | c.3245delC   | p.Thr1082Lysfs*6 | na | 71 | 46 | yes |      |             | NM_020121.3    | 8 | T | T  | 1.28<br>(93.7) |                 | Quality control for prot. export from endoplasmic reticulum                                                                                  |
| 0779 | <i>UGGT2</i>             | frameshift | het.       | c.2156dupA   | p.Ser720Glufs*16 | na | 91 | 36 | yes |      |             |                |   |   |    |                |                 |                                                                                                                                              |
| 1181 | <i>UGGT2</i>             | frameshift | het.       | c.390dupC    | p.Pro131Thrfs*6  | na | 52 | 32 | yes |      |             |                |   |   |    |                |                 |                                                                                                                                              |
| 5019 | <i>WDR35</i>             | frameshift | het.       | c.2238delG   | p.Val747Leufs*29 | na | 73 | 55 | yes |      |             | NM_001006657.1 | 2 | T | T  | 0.48<br>(78.9) | 0.117<br>(65.6) | Required for ciliogenesis and ciliary transport; reports of connection to CASP3, NF-κB and CaMKK/AMPK/p38-MAPK pathways and <i>apoptosis</i> |
| 1649 | <i>WDR35</i>             | nonsense   | het.       | c.2089C>T    | p.Arg697*        | na | 51 | 61 | yes | 1.17 |             |                |   |   |    |                |                 |                                                                                                                                              |
| 1268 | <i>WDR35</i>             | nonsense   | het.       | c.1922T>G    | p.Leu641*        | na | 59 | 74 | yes | 4.48 | rs199952377 |                |   |   |    |                |                 |                                                                                                                                              |
| 0922 | <i>ZC3H8<sup>d</sup></i> | frameshift | het.       | c.859_863del | p.Lys287Valfs*3  | na | 62 | 18 | na  |      |             | NM_032494.2    | 0 | T | T  | 0.22<br>(67.9) | 0.393<br>(21.7) | Transcriptional repressor of GATA3, induces <i>apoptosis</i> when overexpressed in thymocytes                                                |
| 1606 | <i>ZC3H8<sup>d</sup></i> | frameshift | het.       | c.859_863del | p.Lys287Valfs*3  | na | 85 | 20 | na  |      |             |                |   |   |    |                |                 |                                                                                                                                              |

comp.-het. = compound-heterozygous; Cov. = coverage; expr. = expression; F = false; hemiz. = hemizygous; het. = heterozygous; HIS = Haploinsufficiency Score; homo. = homozygous; MRX95 = mental retardation X-linked type 95; nd = not available/applicable; Pat. = Patient; prot. = protein; Ref. = reference allele; RVIS = Residual Variation Intolerance Score; T = true; TCGA = The Cancer Genome Atlas: number of LoF mutations in non-hypermutated CRC; valid. = validation; XMEN = X-linked immunodeficiency with magnesium defect, Epstein-Barr virus infection, and neoplasia

*Italic* gene functions have possible implication for tumorigenesis.

<sup>a</sup> = The expression of candidate genes was determined using the EST profiles of colon tissue and protein expression data from colon glandular cells provided by UniGene and Human Protein Atlas.

<sup>b</sup> = A low (negative) RVIS (-1.85 to -0.55, corresponding to values below the 25<sup>th</sup> percentile) reflects high intolerance to genetic variation, indicating that these genes are subject of purifying selection.

<sup>c</sup> = The HIS, which indicates dosage-sensitive genes, is considered as very low, if the percentage is <10%, and moderately reduced, if the percentage is <40%.

<sup>d</sup> = identified in dominant analysis mode with relaxed cutoff (1%) of allele frequency in reference databases for recurrent variants

**Table S5** Published *MSH3* germline variants in patients with suspected hereditary tumors.

| Phenotype                | No. of Patients Screened | <i>MSH3</i> mutation               | Exon      | Genotype              | Predicted Consequence | Causal Relevance  | Frequency in Controls (ExAC data)                           | Phenotype Mutation Carriers / Family          | Reference            |
|--------------------------|--------------------------|------------------------------------|-----------|-----------------------|-----------------------|-------------------|-------------------------------------------------------------|-----------------------------------------------|----------------------|
| Familial breast cancer   | 99                       | c.162_179del18AGTGAG; p.A57_A62del | 1         | heterozygous          | in-frame              | Polymorphism?     | a number of in-frame deletions are described in this region | clinical criteria Lynch, broad tumor spectrum | Yang et al. 2015     |
|                          |                          | c.199_207del9;p.P67_P69del         | 1         | heterozygous          | in-frame              | Polymorphism?     | p.Pro66_Ala68del has an allele frequency of 57%             |                                               |                      |
|                          |                          | c.2305delG;p.V769*                 | 16        | heterozygous          | frameshift            | Loss-of-function? |                                                             |                                               |                      |
| Suspected Lynch syndrome | 79                       | c.2732T>G;p.Leu911Trp              | 20        | Compound-heterozygous | missense              | Rare variant?     | allele frequency 0.2%                                       |                                               | Duraturo et al. 2011 |
|                          |                          | c.693G>A;p.Pro                     | 4         |                       | silent                | Polymorphism      | allele frequency in normal controls 15%                     |                                               |                      |
| Unselected CRC           | 152                      | c.2785A>T;p.Ile929Phe              | 20        | heterozygous          | missense              | VUS               |                                                             | late-onset CRC                                | Kraus et al. 2015    |
|                          |                          | c.3130+3A>G                        | Intron 22 | heterozygous          | splice?               | VUS               |                                                             |                                               |                      |

CRC = colorectal cancer; VUS = variant of unknown significance

## SUPPLEMENTAL REFERENCES

Duraturo, F., Liccardo, R., Cavallo, A., De Rosa, M., Grosso, M., and Izzo, P. (2011). Association of low-risk *MSH3* and *MSH2* variant alleles with Lynch syndrome: probability of synergistic effects. *Int J Cancer* 129, 1643-1650.

Kraus, C., Rau, T.T., Lux, P., Erlenbach-Wunsch, K., Lohr, S., Krumbiegel, M., Thiel, C.T., Stohr, R., Agaimy, A., Croner, R.S., et al. (2015). Comprehensive screening for mutations associated with colorectal cancer in unselected cases reveals penetrant and nonpenetrant mutations. *Int J Cancer* 136, E559-568.

Yang, X., Wu, J., Lu, J., Liu, G., Di, G., Chen, C., Hou, Y., Sun, M., Yang, W., Xu, X., et al. (2015). Identification of a comprehensive spectrum of genetic factors for hereditary breast cancer in a Chinese population by next-generation sequencing. *PLoS One* 10, e0125571.
